# Supplementary material for: Alternative methods of monitoring emerging contaminants in water: a review
Source: Royal Society of Chemistry journal article supplement (doi:10.1039/d2em00237j), 2022-01-01
Supplement: d2em00237j1.pdf [file d2em00237j1.pdf]

# **Alternative methods of monitoring emerging contaminants in water: A review**

## Supplementary Information

Bhuvaneshwari Manivannan<sup>1</sup>, Gobi Nallathambi<sup>1\*</sup>, Thiyagarajan Devasena<sup>2</sup>

<sup>1</sup> Department of Textile Technology, Anna University, Chennai, Tamil Nadu, India

<sup>2</sup> Centre for Nanoscience and Technology, Anna University, Chennai, Tamil Nadu, India

\*Corresponding author

Email address:

Bhuvaneshwari Manivannan ([bhuvimani021@gmail.com](mailto:bhuvimani021@gmail.com)),

T. Devasena ([tdevasenabio@gmail.com](mailto:tdevasenabio@gmail.com)),

N. Gobi ([gobsnn@gmail.com](mailto:gobsnn@gmail.com))

| Analytes  | Application            | Detection techniques                    | Probe                                                                                                        | Limit of detection                        | Ref |
|-----------|------------------------|-----------------------------------------|--------------------------------------------------------------------------------------------------------------|-------------------------------------------|-----|
| Ibuprofen |                        | Square wave voltammetry                 | Screen printed graphite electrodes                                                                           | 6.3 nM                                    | 1   |
|           |                        | Differential pulse voltammetry          | Gold NPs on a glassy carbon electrode (GCE) surface                                                          | 0.5 pM                                    | 2   |
|           |                        | Differential pulse voltammetry          | Polymer-wrapped AgNP-decorated acid-functionalized with GO (AgNPs@Af-GO-MIP)                                 | $8.7 \times 10^{-9}$ mol L <sup>-1</sup>  | 3   |
|           |                        | Differential pulse voltammetry          | Silver-functionalized carbon nanofiber composite electrodes                                                  | 38 nM                                     | 4   |
|           |                        | Potentiometric                          | cyclodextrins                                                                                                | $3.34 \times 10^{-6}$ M                   | 5   |
|           |                        | Differential pulse voltammetry          | Copper tellurate (Cu <sub>3</sub> TeO <sub>6</sub> ) glassy carbon electrode                                 | 0.017 μM                                  | 6   |
|           |                        | Differential pulse voltammetry          | Silver-modified zeolite-multi-walled carbon nanotubes-epoxy composites electrodes                            | 0.082 μM                                  | 7   |
|           |                        | Differential pulse voltammetry          | Polyaniline nanofiber modified glassy carbon electrode                                                       | 48 nM                                     | 8   |
| Isoniazid | Antibiotics            | Differential pulse voltammetry          | Graphene oxide-based nonsense                                                                                | 0.03 μM                                   | 9   |
| Naproxen  | Anti-inflammatory drug | Amperometric and Potentiometric sensors | nano-spinel zinc ferrite films (ZnFe <sub>2</sub> O <sub>4</sub> )                                           | 0.129 μA μM <sup>-1</sup> and 13 μM       | 10  |
|           |                        | Differential pulse voltammetry          | Gold digital versatile disc chip modified with graphene oxide decorated with Ag nanoparticles/β-cyclodextrin | 0.023 μM and 0.08 μM                      | 11  |
|           |                        | Differential pulse voltammetry          | MWCNT and microsomal P4501A2 (msCYP1A2) on a graphite screen-printed electrode (SPE)                         | 16 μM                                     | 12  |
|           |                        | Differential pulse voltammetry          | Boron-Doped Diamond Electrode                                                                                | 30 nM                                     | 13  |
|           |                        | Differential pulse voltammetry          | MWCNT-graphene hybrid                                                                                        | $1.25 \times 10^{-7}$ mol L <sup>-1</sup> | 14  |
|           |                        | Differential pulse voltammetric         | Platinum electrode                                                                                           | 0.1 mM <sup>1</sup>                       | 15  |
|           |                        | Differential pulse voltammetry          | MWCNT- on a glassy carbon electrode (GCE) surface                                                            | 0.6 μM                                    | 16  |
| Aspirin   | Antiplatelet drug      | Differential pulse voltammetry          | Polymer-wrapped (P4VP) MWCNT                                                                                 | 4.42 nM                                   | 17  |
|           |                        | Differential pulse voltammetry          | Chitosan capped with AuNPs on a screen-printed carbon electrode (SPCE)                                       | 0.166 pM                                  | 18  |
|           |                        | Differential pulse voltammetry          | Boron-Doped Diamond Electrode                                                                                | 7.2 μM                                    | 19  |
|           |                        | Differential                            | Polyaniline/rGO                                                                                              | 6.1 μM                                    | 20  |

|            |                        |                                               |                                                                        |                                |    |
|------------|------------------------|-----------------------------------------------|------------------------------------------------------------------------|--------------------------------|----|
| Diclofenac | Anti-inflammatory drug | pulse voltammetry                             |                                                                        |                                |    |
|            |                        | Square-wave adsorptive stripping voltammetric | Immobilized copper ions on MWCNTS-Chitosan thin film                   | 21 nM                          | 21 |
|            |                        | Differential-pulse voltammetry                | Multiwalled Carbon Nanotubes-Modified GCE                              | 0.2 to 6.0 $\mu$ M and 13.2 nM | 22 |
| Celecoxib  | Anti-inflammatory drug | Differential pulse voltammetry                | Silver-choline chloride modified graphene oxide                        | $2.51 \times 10^{-9}$ M        | 23 |
|            |                        | Differential pulse voltammetry                | Boron-doped diamond and edge plane graphite electrodes                 | $1.03 \times 10^{-9}$ M        | 24 |
| Paroxetine | Antidepressant drug    | Differential pulse voltammetry                | Boron-doped diamond and edge plane graphite electrodes                 | 0.9 nM                         | 25 |
| Clozantel  | Antidepressant drug    | Differential pulse voltammetry                | Boron-Doped Diamond Electrode                                          | 7.0 nM                         | 26 |
| Fluoxetine | Antidepressant         | Differential pulse voltammetry                | Graphite- Molecularly imprinted polymer- carbon paste electrode        | 3.0 nM                         | 27 |
|            |                        | Differential pulse voltammetry                | carbon nanoparticles (CNPs) thin-film modified glassy carbon electrode | 0.4 $\mu$ M                    | 28 |
|            |                        |                                               |                                                                        |                                |    |

**Table S1:** Some of the pharmaceutical compounds detected using electrochemical methods.

#### References:

1. Amin, S., Soomro, M.T., Memon, N., Solangi, A.R., Qureshi, T. and Behzad, A.R., 2014. Disposable screen printed graphite electrode for the direct electrochemical determination of ibuprofen in surface water. *Environmental Nanotechnology, Monitoring & Management*, 1, pp.8-13.
2. Roushani, M. and Shahdost-Fard, F., 2016. Covalent attachment of aptamer onto nanocomposite as a high performance electrochemical sensing platform: Fabrication of an ultra-sensitive ibuprofen electrochemical aptasensor. *Materials Science and Engineering: C*, 68, pp.128-135.
3. Nair, A.S. and Sooraj, M.P., 2020. Molecular imprinted polymer-wrapped AgNPs-decorated acid-functionalized graphene oxide as a potent electrochemical sensor for ibuprofen. *Journal of Materials Science*, 55(8), pp.3700-3711.
4. Manea, F., Motoc, S., Pop, A., Remes, A. and Schoonman, J., 2012. Silver-functionalized carbon nanofiber composite electrodes for ibuprofen detection. *Nanoscale research letters*, 7(1), pp.1-4.
5. Sousa, T.F.A., Amorim, C.G., Montenegro, M.C.B.S.M. and Araújo, A.N., 2013. Cyclodextrin based potentiometric sensor for determination of ibuprofen in pharmaceuticals and waters. *Sensors and Actuators B: Chemical*, 176, pp.660-666.

6. Mutharani, B., Ranganathan, P. and Chen, S.M., 2020. Stimuli-enabled reversible switched acetonitrile electrochemical sensor based on smart PNIPAM/PANI-Cu hybrid conducting microgel. *Sensors and Actuators B: Chemical*, 304, p.127232.
7. Motoc, S., Remes, A., Pop, A., Manea, F. and Schoonman, J., 2013. Electrochemical detection and degradation of ibuprofen from water on multi-walled carbon nanotubes-epoxy composite electrode. *Journal of Environmental Sciences*, 25(4), pp.838-847.
8. Suresh, E., Sundaram, K., Kavitha, B. and Kumar, N.S., 2016. Electroanalysis of ibuprofen on conducting polyaniline nanofiber coated glassy carbon surface. *Int. J. Current Pharmaceutical Res.*, 8, pp.44-48.
9. Qian, L., Durairaj, S., Prins, S. and Chen, A., 2021. Nanomaterial-based electrochemical sensors and biosensors for the detection of pharmaceutical compounds. *Biosensors and Bioelectronics*, 175, p.112836.
10. Kanagasabapathy, M. and Sekar, R., 2019. Chronopotentiometric/chronoamperometric transient analysis of naproxen via electrochemically synthesized nano spinel ZnFe<sub>2</sub>O<sub>4</sub> films. *Journal of Electroanalytical Chemistry*, 832, pp.59-68.
11. Tarahomi, M., Alinezhad, H. and Maleki, B., 2019. Immobilizing Pd nanoparticles on the ternary hybrid system of graphene oxide, Fe<sub>3</sub>O<sub>4</sub> nanoparticles, and PAMAM dendrimer as an efficient support for catalyzing sonogashira coupling reaction. *Applied Organometallic Chemistry*, 33(11), p.e5203.
12. Baj-Rossi, C., Jost, T.R., Cavallini, A., Grassi, F., De Micheli, G. and Carrara, S., 2014. Continuous monitoring of Naproxen by a cytochrome P450-based electrochemical sensor. *Biosensors and Bioelectronics*, 53, pp.283-287.
13. Suryanarayanan, V., Zhang, Y., Yoshihara, S. and Shirakashi, T., 2005. Voltammetric assay of naproxen in pharmaceutical formulations using boron-doped diamond electrode. *Electroanalysis: An International Journal Devoted to Fundamental and Practical Aspects of Electroanalysis*, 17(11), pp.925-932.
14. Sarhangzadeh, K., 2015. Application of multi wall carbon nanotube-graphene hybrid for voltammetric determination of naproxen. *Journal of the Iranian Chemical Society*, 12(12), pp.2133-2140.
15. Adhoum, N., Monser, L., Toumi, M. and Boujlel, K., 2003. Determination of naproxen in pharmaceuticals by differential pulse voltammetry at a platinum electrode. *Analytica chimica acta*, 495(1-2), pp.69-75.
16. Montes, R.H., Stefano, J.S., Richter, E.M. and Munoz, R.A., 2014. Exploring multiwalled carbon nanotubes for naproxen detection. *Electroanalysis*, 26(7), pp.1449-1453.
17. Ghadimi, H., Tehrani, R.M., Basirun, W.J., Ab Aziz, N.J., Mohamed, N. and Ab Ghani, S., 2016. Electrochemical determination of aspirin and caffeine at MWCNTs-poly-4-vinylpyridine composite modified electrode. *Journal of the Taiwan Institute of Chemical Engineers*, 65, pp.101-109.
18. Diouf, A., Moufid, M., Bouyahya, D., Österlund, L., El Bari, N. and Bouchikhi, B., 2020. An electrochemical sensor based on chitosan capped with gold nanoparticles combined with a voltammetric electronic tongue for quantitative aspirin detection in human physiological fluids and tablets. *Materials Science and Engineering: C*, 110, p.110665.

19. Mostafavi, M., Yaftian, M.R., Piri, F. and Shayani-Jam, H., 2018. A new diclofenac molecularly imprinted electrochemical sensor based upon a polyaniline/reduced graphene oxide nano-composite. *Biosensors and Bioelectronics*, 122, pp.160-167.
20. Shalauddin, M., Akhter, S., Bagheri, S., Abd Karim, M.S., Kadri, N.A. and Basirun, W.J., 2017. Immobilized copper ions on MWCNTS-Chitosan thin film: Enhanced amperometric sensor for electrochemical determination of diclofenac sodium in aqueous solution. *International Journal of Hydrogen Energy*, 42(31), pp.19951-19960.
21. Sataraddi, S.R., Patil, S.M., Bagoji, A.M., Pattar, V.P. and Nandibewoor, S.T., 2014. Electrooxidation of indomethacin at multiwalled carbon nanotubes-modified GCE and its determination in pharmaceutical dosage form and human biological fluids. *International Scholarly Research Notices*, 2014.
22. Parsaee, Z., Karachi, N., Abrishamifar, S.M., Kahkha, M.R.R. and Razavi, R., 2018. Silver-choline chloride modified graphene oxide: Novel nano-bioelectrochemical sensor for celecoxib detection and CCD-RSM model. *Ultrasonics Sonochemistry*, 45, pp.106-115.
23. Brycht, M., Nosal-Wiercińska, A., Sipa, K., Rudnicki, K. and Skrzypek, S., 2017. Electrochemical determination of closantel in the commercial formulation by square-wave adsorptive stripping voltammetry. *Monatshefte für Chemie-Chemical Monthly*, 148(3), pp.463-472.
24. Oghli, A.H. and Soleymanpour, A., 2020. Polyoxometalate/reduced graphene oxide modified pencil graphite sensor for the electrochemical trace determination of paroxetine in biological and pharmaceutical media. *Materials Science and Engineering: C*, 108, p.110407.
25. Brycht, M., Özmen, T., Burnat, B., Kaczmarska, K., Leniart, A., Taştekin, M., Kılıç, E. and Skrzypek, S., 2016. Voltammetric behavior, quantitative determination, and corrosion investigation of herbicide bromacil. *Journal of Electroanalytical Chemistry*, 770, pp.6-13.
26. Brycht, M., Skrzypek, S., Karadas-Bakirhan, N., Smarzewska, S., Bozal-Palabiyik, B., Ozkan, S.A. and Uslu, B., 2015. Voltammetric behavior and determination of antidepressant drug paroxetine at carbon-based electrodes. *Ionics*, 21(8), pp.2345-2354.
27. Alizadeh, T. and Azizi, S., 2016. Graphene/graphite paste electrode incorporated with molecularly imprinted polymer nanoparticles as a novel sensor for differential pulse voltammetry determination of fluoxetine. *Biosensors and Bioelectronics*, 81, pp.198-206.
28. Mohammadi, A., Moghaddam, A.B., Alikhani, E., Eilkhani, K. and Mozaffari, S., 2013. Electrochemical quantification of fluoxetine in pharmaceutical formulation using carbon nanoparticles. *Micro & Nano Letters*, 8(12), pp.853-857.
